# Supplementary material for: Diversity of Eastern North American Ant Communities along Environmental Gradients
Source: PubMed Central journal article supplement (PMC3709931; doi:10.1371/journal.pone.0067973), 2013-07-12
Supplement: pone.0067973.s002.pdf [file pone.0067973.s002.pdf]

**File S2**

| Site ID | PCoAxis.1 Score | PCoAxis.2 Score |
|---------|-----------------|-----------------|
| ABSF    | -2.077470208    | 0.22394882      |
| ALLSP   | -1.146912936    | 0.002985527     |
| ANSF    | 0.932747734     | 0.302512646     |
| ARSP    | 0.469375482     | -0.35915954     |
| BAXP    | 0.597013691     | 0.749807201     |
| B BSP   | -0.055318592    | -0.887767641    |
| BESF    | -0.829018399    | -0.42130299     |
| BTBSP   | -0.837559346    | -0.177772515    |
| CFSP    | -0.122757279    | -1.213041239    |
| CHESP   | -0.1635147      | -0.512999686    |
| CHSP    | 0.743801748     | -0.299039236    |
| COKSP   | 0.151564943     | -0.617231691    |
| CONROB  | -1.178976488    | 1.274315532     |
| CRKSP   | 0.217819693     | 1.007587043     |
| CSF     | -2.077470208    | 0.22394882      |
| CWSF    | -0.473169107    | 0.59943944      |
| DRRD    | -0.262474592    | 1.407808043     |
| ENSF    | -0.473169107    | 0.59943944      |
| FBSF    | 0.211980884     | 0.623349573     |
| FBSP    | 1.196393066     | -0.339462659    |
| GASF    | 0.755339367     | 0.063931206     |
| GBSF    | 0.186820933     | 1.148916087     |
| GFSP    | -1.418853446    | 0.190166399     |
| GMNF1   | 1.316981529     | 0.349241479     |
| GMNF2   | 1.018830792     | 0.297886164     |
| GMNF3   | 1.251453314     | 0.463047017     |
| GPRD    | -0.77989005     | 0.84187424      |
| GRRSF   | -0.39491938     | 0.961383621     |
| GWSF    | 1.269641443     | 0.2587362       |
| HFLTER  | -0.140301531    | -0.799481902    |
| HFLTER2 | -0.375050376    | -1.535425771    |
| HPSF    | -0.444474563    | -0.610526241    |
| LACSF   | -0.209737644    | -0.898550232    |
| LRD     | -1.169415652    | -0.440313574    |

| Site ID | PCoAxis.1 Score | PCoAxis.2 Score |
|---------|-----------------|-----------------|
| LRSP    | -0.39330574     | 0.34302629      |
| LSF     | -0.864116928    | 0.768479416     |
| MMSP    | -0.383496254    | -1.248736456    |
| MOHO    | 0.246455324     | 0.194380038     |
| MPSP    | 0.955901006     | -0.42860405     |
| MSSP    | -0.405651646    | -0.443195224    |
| MTCAR   | 1.148823951     | 0.035905751     |
| MTGSR1  | 1.485655153     | 0.516540154     |
| MTGSR2  | 0.150793409     | -0.082394643    |
| NATSF   | 1.001955646     | -0.339383181    |
| PACSF   | 0.341914612     | -0.809854542    |
| PESF    | -1.348785824    | 0.674220869     |
| PGSP    | 0.524039362     | 0.042236304     |
| PITSF   | 0.604905703     | 0.674694619     |
| PRSF    | -0.875514563    | 0.11752935      |
| QUESP   | 1.066702526     | 0.090017955     |
| RAMT    | -0.136641731    | -0.599354719    |
| RBSP    | -0.246757804    | -0.723647661    |
| RSF     | -0.964246375    | -0.362157507    |
| SPRSF1  | 0.530274444     | 0.311621198     |
| SPRSF2  | 0.632035519     | 0.421970656     |
| SRISP   | 0.41410239      | 0.559214418     |
| STKSF   | -1.046140742    | -0.514915054    |
| WEISF1  | -0.021644149    | -0.392047674    |
| WEISF2  | 0.11808008      | 0.262647043     |
| WFSP    | 0.245647854     | 0.580219206     |
| WILSF   | 0.293658434     | -1.173720405    |
| WMNF1   | 0.29434573      | -0.885654789    |
| WMNF2   | 1.347004565     | 0.42909912      |
| WMNF3   | 0.149383773     | -1.179419909    |
| WOMSP   | 1.155382145     | -0.073176695    |
| WSF     | -0.41527783     | 0.880883461     |
| WSRD    | -0.366122075    | 0.485232016     |

File S2- Table 1: Site Scores from Principal Coordinates Analysis

| Species | Score1   | Score2   |
|---------|----------|----------|
| Abibal  | 0.155917 | 0.002305 |
| Acepen  | 0.027631 | 0.027612 |
| Acerrub | -0.36515 | -0.27663 |
| Acesac  | 0.579522 | 0.384929 |
| Acespi  | 0.040773 | 0.010512 |
| Ambra   | -0.03786 | 0.051772 |
| Aritri  | 0.023886 | -0.01215 |
| Astspp  | -0.01707 | 0.014708 |
| Aurnud  | 0.073278 | -0.01238 |
| Betall  | 0.36615  | 0.107278 |
| Betcor  | 0.004843 | -0.00335 |
| Betlen  | -0.22574 | 0.013785 |
| Betpap  | 0.061086 | -0.09981 |
| Bryspp  | 0.025499 | 0.041118 |
| Carcar  | -0.05082 | -0.01312 |
| Cargla  | -0.00525 | -0.02084 |
| Carova  | -0.23871 | 0.023529 |
| Carspp  | -0.07342 | 0.312176 |
| Cartom  | -0.22194 | 0.042732 |
| Chathy  | -0.03689 | -0.05386 |
| Chimac  | -0.09958 | 0.000284 |
| Cirspp  | 0.029954 | 0.01229  |
| Clealn  | -0.03683 | 0.000121 |
| Clibor  | 0.004843 | -0.00335 |
| Comspp  | 0.072109 | -0.02908 |
| Copspp  | 0.036268 | -0.02197 |
| Corflo  | -0.04556 | 0.007726 |
| Corspp  | -0.02891 | 0.10481  |
| Cryspp  | 0.040773 | 0.010512 |
| Daucar  | 0.043434 | 0.062178 |

| Species | Score1   | Score2   |
|---------|----------|----------|
| Faggra  | 0.435666 | 0.423908 |
| Frapen  | -0.13343 | 0.018197 |
| Fraves  | 0.038598 | 0.057874 |
| Gaupro  | 0.013566 | 0.001696 |
| Gerrob  | 0.040773 | 0.010512 |
| Hamvir  | -0.02248 | 0.023658 |
| Ilespp  | -0.04556 | 0.007726 |
| Junvir  | -0.17675 | 0.045589 |
| Kallat  | -0.15493 | -0.1328  |
| Liqspp  | -0.04331 | 0.029129 |
| Lirtul  | -0.16938 | 0.034038 |
| Lycspp  | -0.00522 | -0.01279 |
| Miacan  | 0.207264 | -0.14679 |
| Mitrep  | -0.01263 | 0.013936 |
| Narspp  | 0.006808 | 0.025325 |
| Nysspp  | -0.05759 | -0.03183 |
| Parqui  | -0.2598  | 0.094505 |
| Phespp  | -0.02812 | 0.004775 |
| Picgla  | 0.092081 | -0.02222 |
| Picrub  | 0.081431 | 0.009067 |
| Pinres  | 0.003021 | -0.08398 |
| Pinrig  | -0.03783 | -0.06877 |
| Pinstro | 0.008416 | -0.62559 |
| Pintae  | -0.04331 | 0.029129 |
| Pinvir  | -0.02505 | 0.034203 |
| Poaspp  | 0.114352 | -0.07272 |
| Polcom  | 0.025162 | 0.030528 |
| Potspp  | -0.03097 | -0.01471 |
| Prupen  | 0.006808 | 0.025325 |
| Pruser  | 0.010538 | 0.034209 |

| Species | Score1   | Score2   |
|---------|----------|----------|
| Ptespp  | 0.155513 | -0.09405 |
| Quealb  | -0.35082 | 0.206518 |
| Queber  | -0.23736 | -0.10335 |
| Quecoc  | 0.008047 | 0.001878 |
| Quepal  | -0.00525 | -0.02084 |
| Quepri  | -0.18664 | 0.235225 |
| Querub  | -0.49804 | 0.209185 |
| Ranspp  | -0.04556 | 0.007726 |
| Rosmul  | -0.04556 | 0.007726 |
| Rubale  | -0.04598 | 0.039307 |
| Ruball  | -0.14767 | 0.15393  |
| Rubhis  | -0.31339 | 0.202092 |
| Rubide  | 0.006808 | 0.025325 |
| Rubleu  | -0.03097 | -0.01471 |
| Rubspp  | 0.439035 | -0.14288 |
| Sasalb  | -0.07521 | 0.08602  |
| Smispp  | -0.0137  | 0.026845 |
| Solspp  | 0.107291 | 0.013583 |
| Sumspp  | -0.00439 | -0.02435 |
| Tarspp  | -0.0336  | -0.02092 |
| Toxrad  | -0.13796 | -0.08063 |
| Tribor  | 0.213228 | -0.01104 |
| Trilspp | 0.014589 | -0.02639 |
| Trispp  | 0.061581 | -0.08252 |
| Tsucan  | 0.31166  | -0.35099 |
| Vacang  | -0.03683 | 0.000121 |
| Vaccor  | -0.03683 | 0.000121 |
| Vacspp  | -0.2006  | -0.15461 |
| Viblan  | 0.048662 | 0.034085 |
| Viospp  | -0.00898 | -0.05556 |

File S2- Table 2: Vegetation Species Scores from Principal Coordinates Analysis

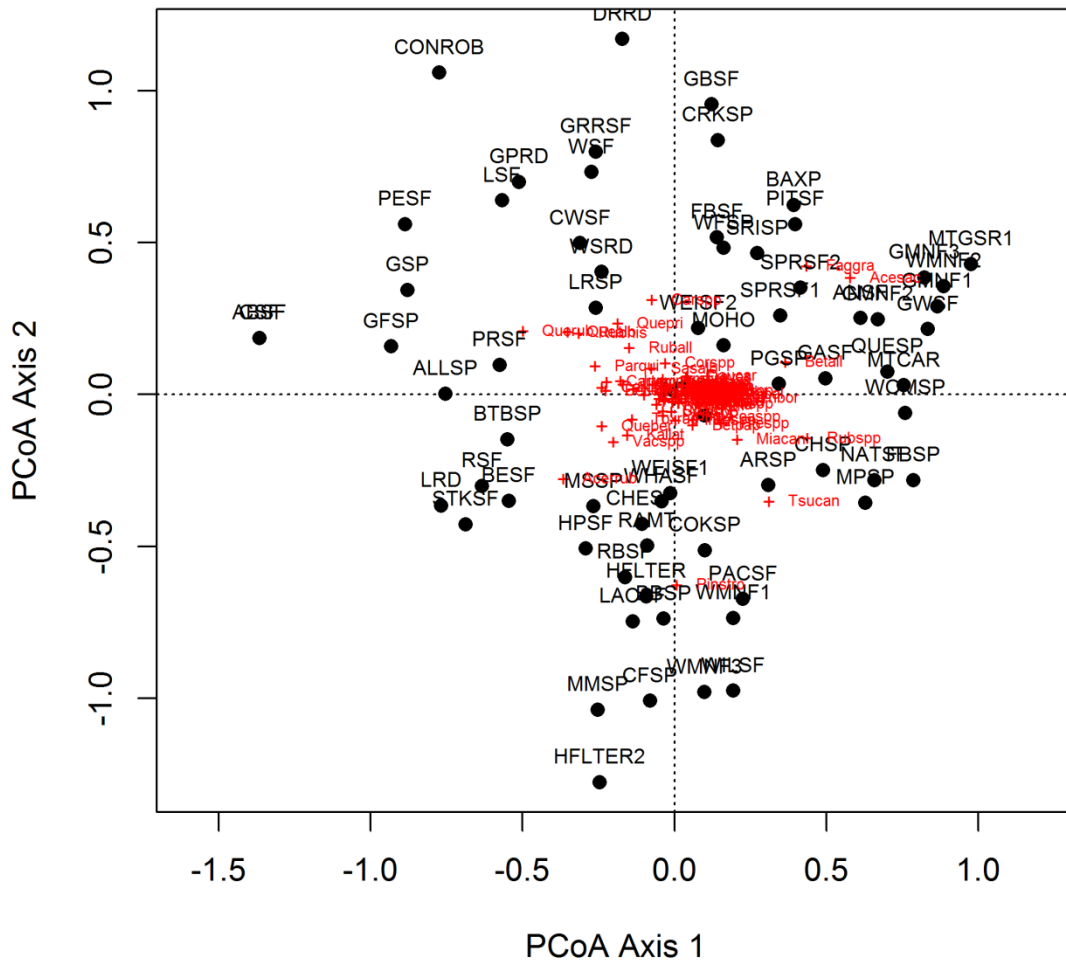

S2- Figure 1: Site and species biplot of Principal Coordinate Analysis Results. Solid circles indicate site scores presented in table above. Red crosses indicate species scores listed in table above.
