# Supplementary material for: Diversity of Eastern North American Ant Communities along Environmental Gradients
Source: PubMed Central journal article supplement (PMC3709931; doi:10.1371/journal.pone.0067973), 2013-07-12
Supplement: pone.0067973.s003.pdf [file pone.0067973.s003.pdf]

*Forests Geographic Dissimilarity*

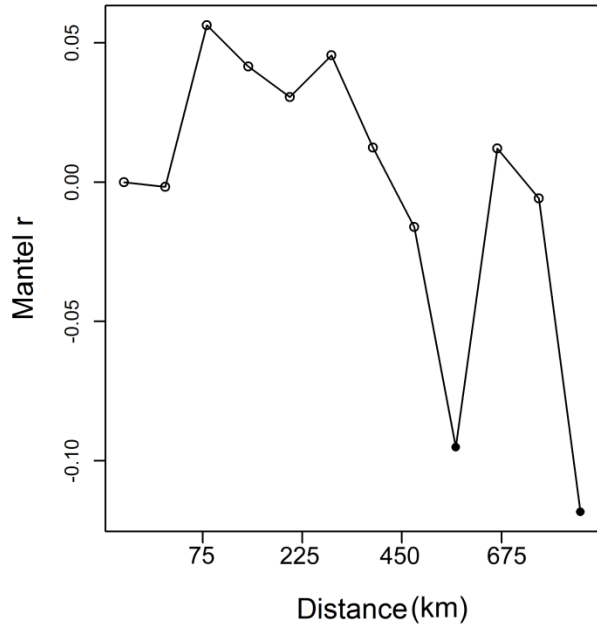

*Open Geographic Dissimilarity*

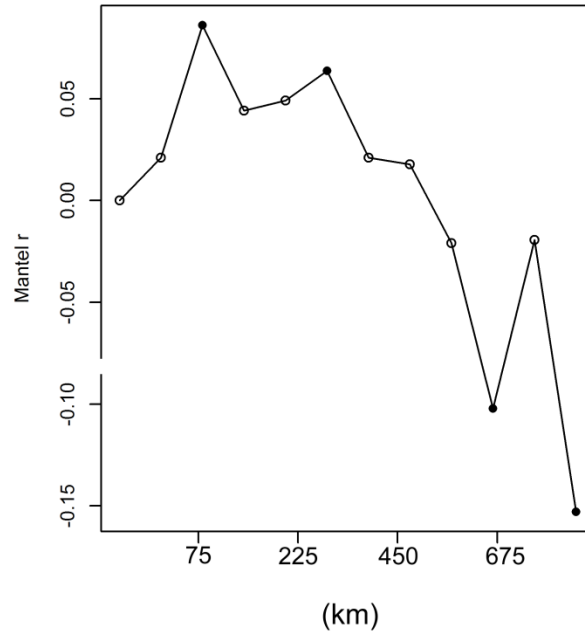

*Combined Datasets Geographic Dissimilarity*

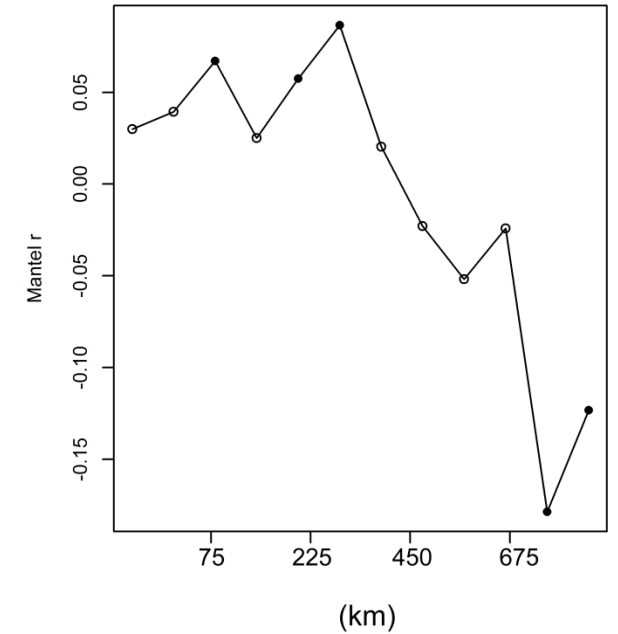

*Forests Temperature Dissimilarity*

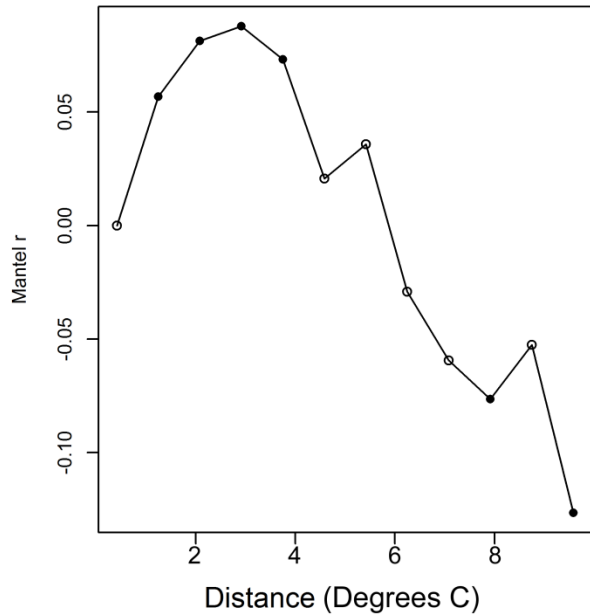

*Open Temperature Dissimilarity*

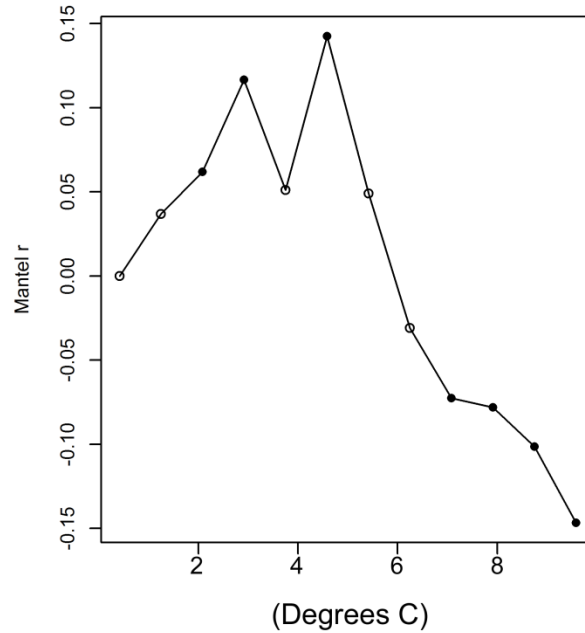

*Combined Datasets Temperature Dissimilarity*

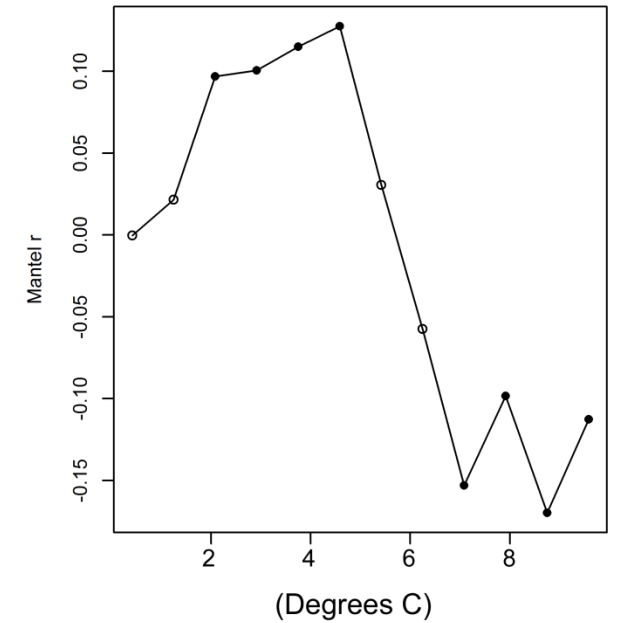

**File S3: Figure 1:** Mantel Correlogram: Correlations between geographic distance (in km) and mean annual temperature distances (in degrees Celsius). Sorted by forested habitat, open habitat and the combined datasets. Significant correlations are indicated by filled circles ( $p \leq 0.05$ ).
