# Supplementary material for: Diversity of Eastern North American Ant Communities along Environmental Gradients
Source: PubMed Central journal article supplement (PMC3709931; doi:10.1371/journal.pone.0067973), 2013-07-12
Supplement: pone.0067973.s004.pdf [file pone.0067973.s004.pdf]

## File S4: Generalized Linear Model Table Summaries

### Model details associated with Table 1

#### Model:

**glm(formula = Species\_Observed ~ Latitude + Longitude + Elevation + Veg\_PCoA1 + NLCD\_Name + Latitude:Elevation, family = "poisson")**

| Variable           | Estimate   | Standard Error | p-value |
|--------------------|------------|----------------|---------|
| Intercept          | 18.2055674 | 7.0987605      | 0.01033 |
| Latitude           | -0.1344350 | 0.0787792      | 0.08792 |
| Longitude          | 0.1467120  | 0.0581913      | 0.01170 |
| Elevation          | 0.0095586  | 0.0043442      | 0.02778 |
| Veg PCoA1          | -0.2896775 | 0.1023921      | 0.00467 |
| NLCD Name          | 0.2501576  | 0.1503892      | 0.09623 |
| Latitude:Elevation | -0.0002254 | 0.0001068      | 0.03493 |

#### Model:

**glm(formula = Species\_Observed ~ Latitude + Longitude + Elevation + Veg\_PCoA1 + NDVI + Latitude:Elevation + Latitude:Longitude, family = "poisson")**

| Variable           | Estimate   | Standard Error | p-value  |
|--------------------|------------|----------------|----------|
| Intercept          | 7.610e+01  | 2.134e+01      | 0.000363 |
| Latitude           | -1.789e+00 | 5.011e-01      | 0.000358 |
| Longitude          | 1.032e+00  | 2.889e-01      | 0.000356 |
| Elevation          | 1.100e-02  | 3.943e-03      | 0.005264 |
| Vegetation PCoA1   | -1.499e-01 | 7.851e-02      | 0.056212 |
| NDVI               | 2.009e+00  | 7.717e-01      | 0.009249 |
| Latitude*Longitude | -2.454e-02 | 6.871e-03      | 0.000356 |
| Latitude*Elevation | -2.709e-04 | 9.675e-05      | 0.005104 |

#### Model:

**glm(formula = Species\_Observed ~ Latitude + Longitude + Elevation + Veg\_PCoA1 + Latitude:Elevation + Latitude:Longitude)**

| Variable           | Estimate   | Standard Error | p-value  |
|--------------------|------------|----------------|----------|
| Intercept          | 6.521e+01  | 1.768e+01      | 0.000226 |
| Latitude           | -1.404e+00 | 4.141e-01      | 0.000696 |
| Longitude          | 8.089e-01  | 2.391e-01      | 0.000717 |
| Elevation          | 8.700e-03  | 3.235e-03      | 0.007163 |
| Veg PCoA1          | -1.014e-01 | 6.535e-02      | 0.120840 |
| Latitude*Longitude | -2.139e-04 | 7.913e-05      | 0.006882 |
| Latitude*Elevation | -1.816e-02 | 5.690e-03      | 0.001416 |

**Model details associated with Table 2**

**Model:**

**glm(formula = Species\_Observed ~ Soil\_Type + Veg\_PCoA1 + NLCD\_Name)**

| <b>Variable</b> | <b>Estimate</b> | <b>Standard Error</b> | <b>p-value</b> |
|-----------------|-----------------|-----------------------|----------------|
| Intercept       | 0.56512         | 0.73048               | 0.439147       |
| Soil Type       | 1.56023         | 0.75369               | 0.038442       |
| Veg PCoA1       | -0.30571        | 0.07414               | 3.74e-05       |
| NLCD Class      | 0.51616         | 0.14503               | 0.000372       |

**Model:**

**glm(formula = Species\_Observed ~ Soil\_Type + Veg\_PCoA1 + NDVI)**

| <b>Variable</b> | <b>Estimate</b> | <b>Standard Error</b> | <b>p-value</b> |
|-----------------|-----------------|-----------------------|----------------|
| Intercept       | 0.09462         | 0.69179               | 0.89121        |
| Soil Type       | 0.57896         | 0.21508               | 0.00711        |
| Veg PCoA1       | -0.13158        | 0.05228               | 0.01184        |
| NDVI            | 2.58105         | 0.81742               | 0.00159        |

**Model:**

**glm(formula = Species\_Observed ~ Soil\_Type + Temperature\_Max + NDVI)**

| <b>Variable</b> | <b>Estimate</b> | <b>Standard Error</b> | <b>p-value</b> |
|-----------------|-----------------|-----------------------|----------------|
| Intercept       | 0.665471        | 0.610866              | 0.2760         |
| Soil Type       | 0.336299        | 0.178069              | 0.0589         |
| Temp Max        | 0.064303        | 0.014670              | 1.17e-05       |
| NDVI            | 1.142171        | 0.633106              | 0.0712         |
