# Supplementary material for: Diversity of Eastern North American Ant Communities along Environmental Gradients
Source: PubMed Central journal article supplement (PMC3709931; doi:10.1371/journal.pone.0067973), 2013-07-12
Supplement: pone.0067973.s005.pdf [file pone.0067973.s005.pdf]

### Species\_Observed - page

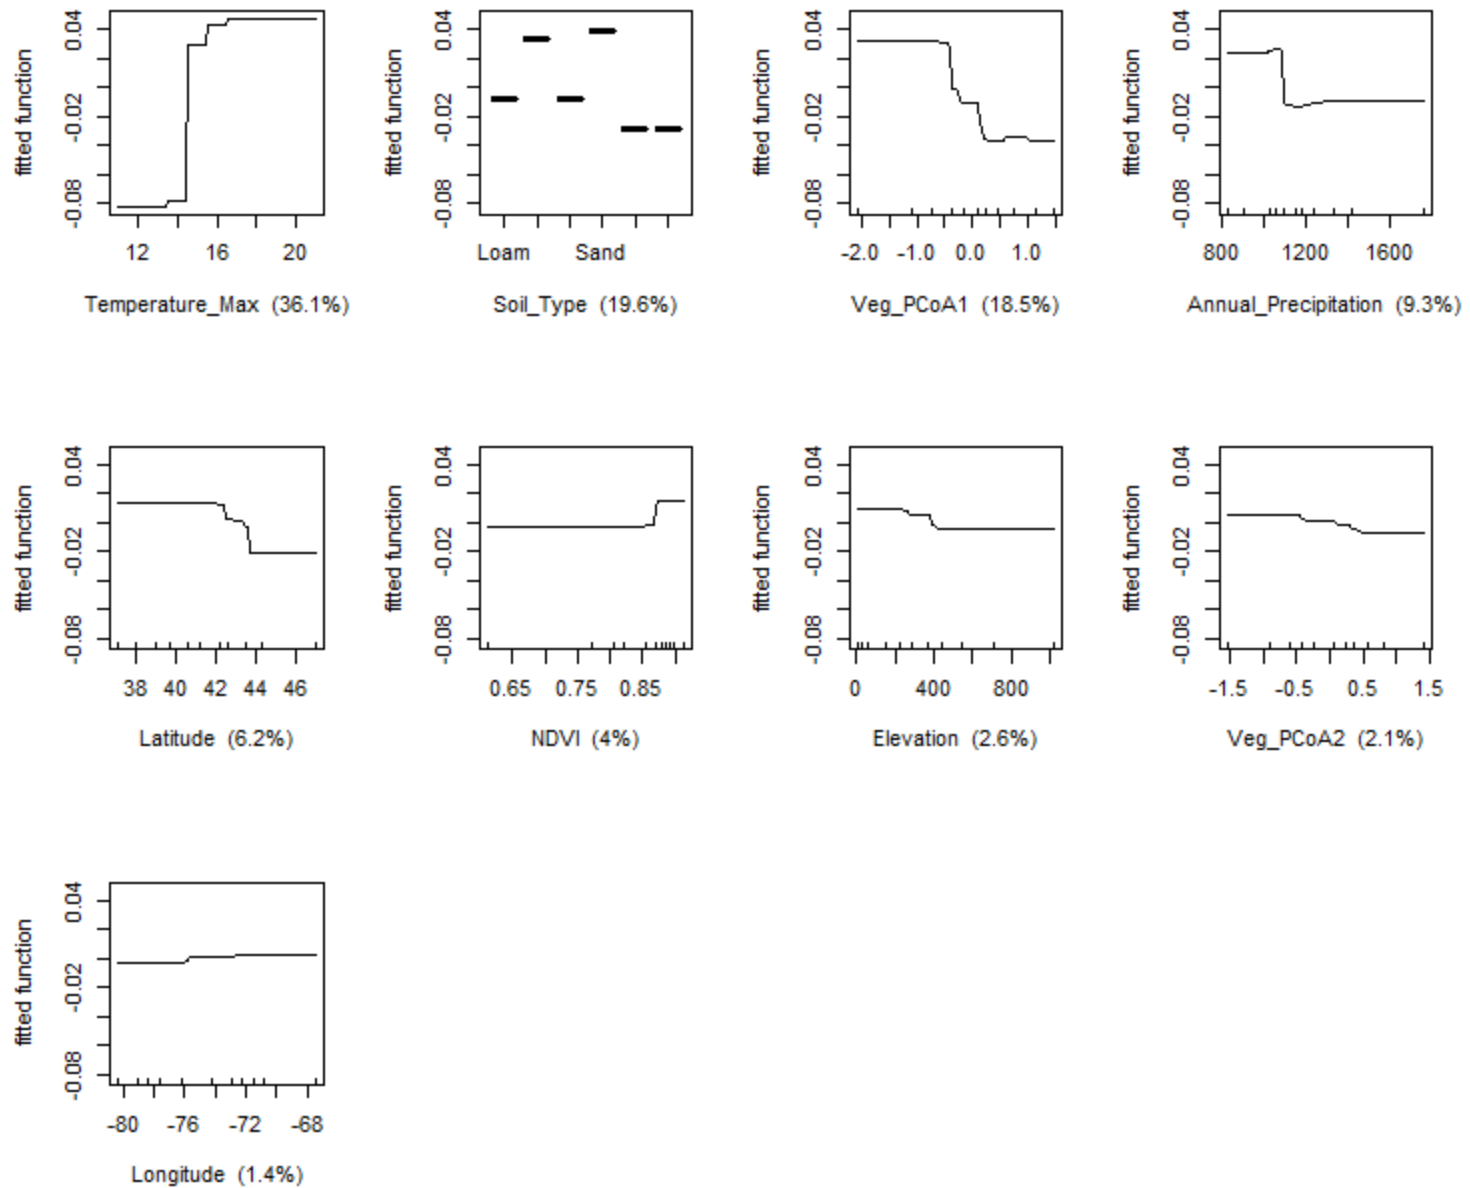

File S5 Figure S3: Combined datasets BRT Fitted Functions for each environmental variable

### Species\_Observed - page

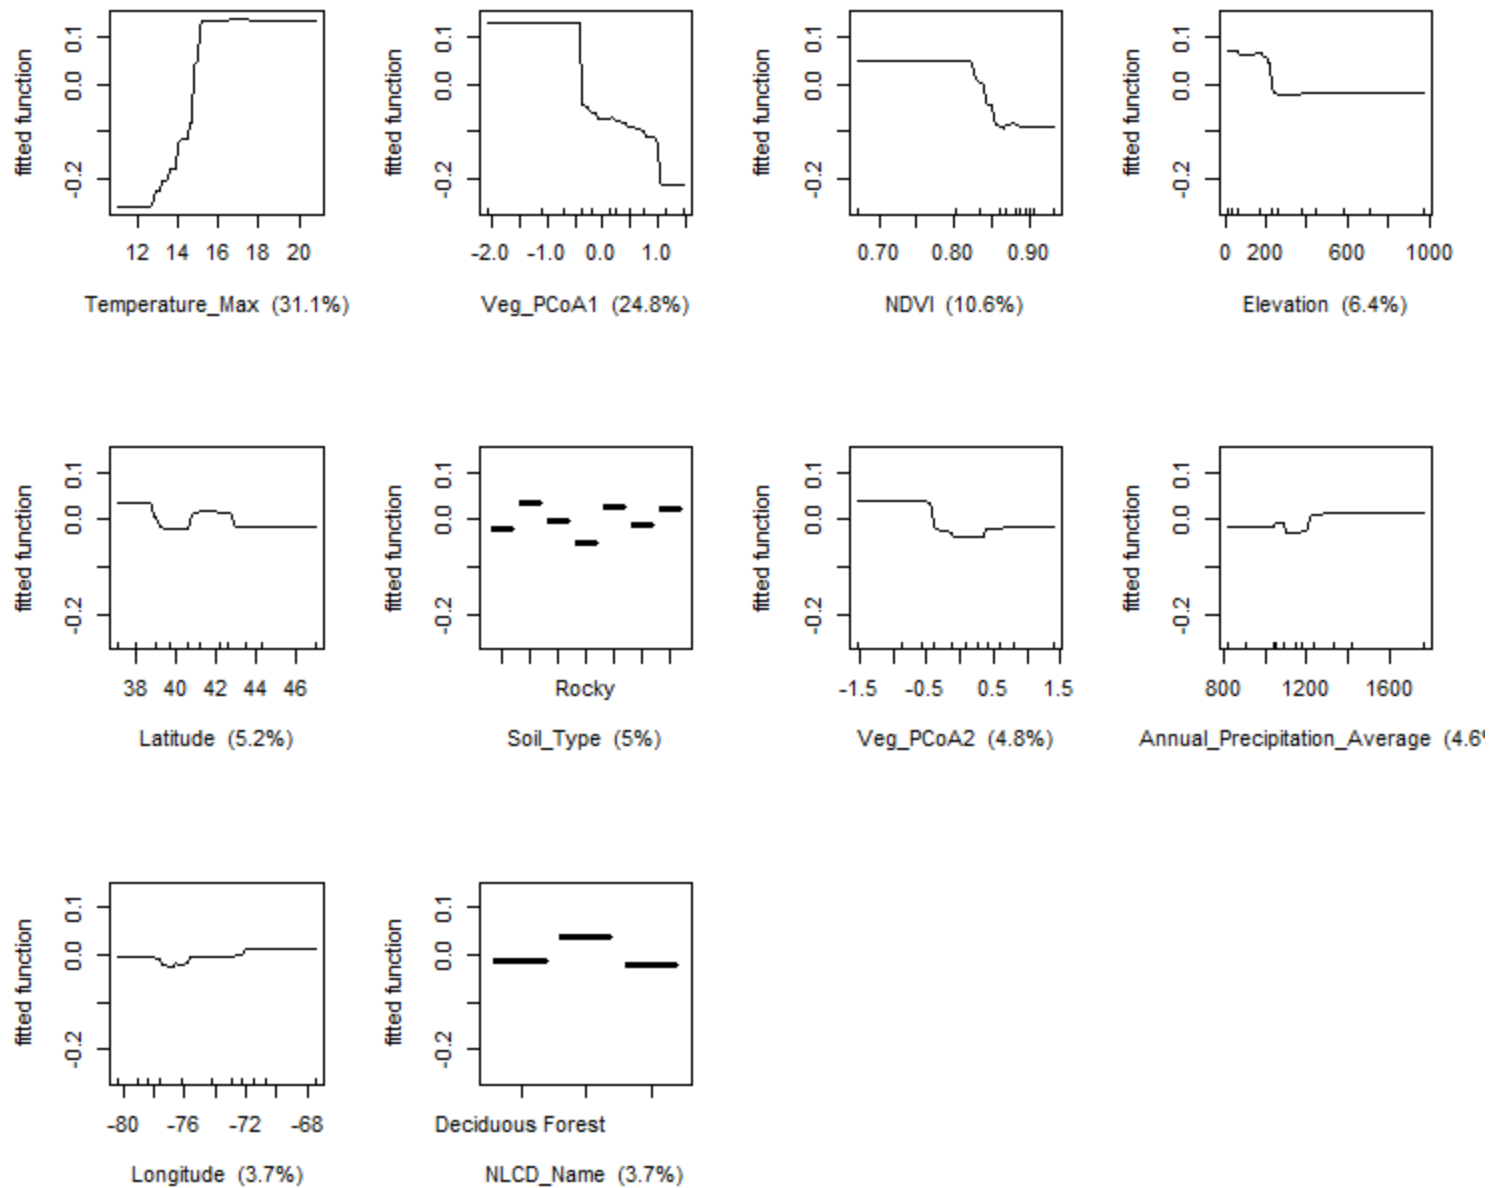

File S5 Figure-S4: Forest dataset BRT Fitted Functions for each environmental variable

### Species\_Observed - page

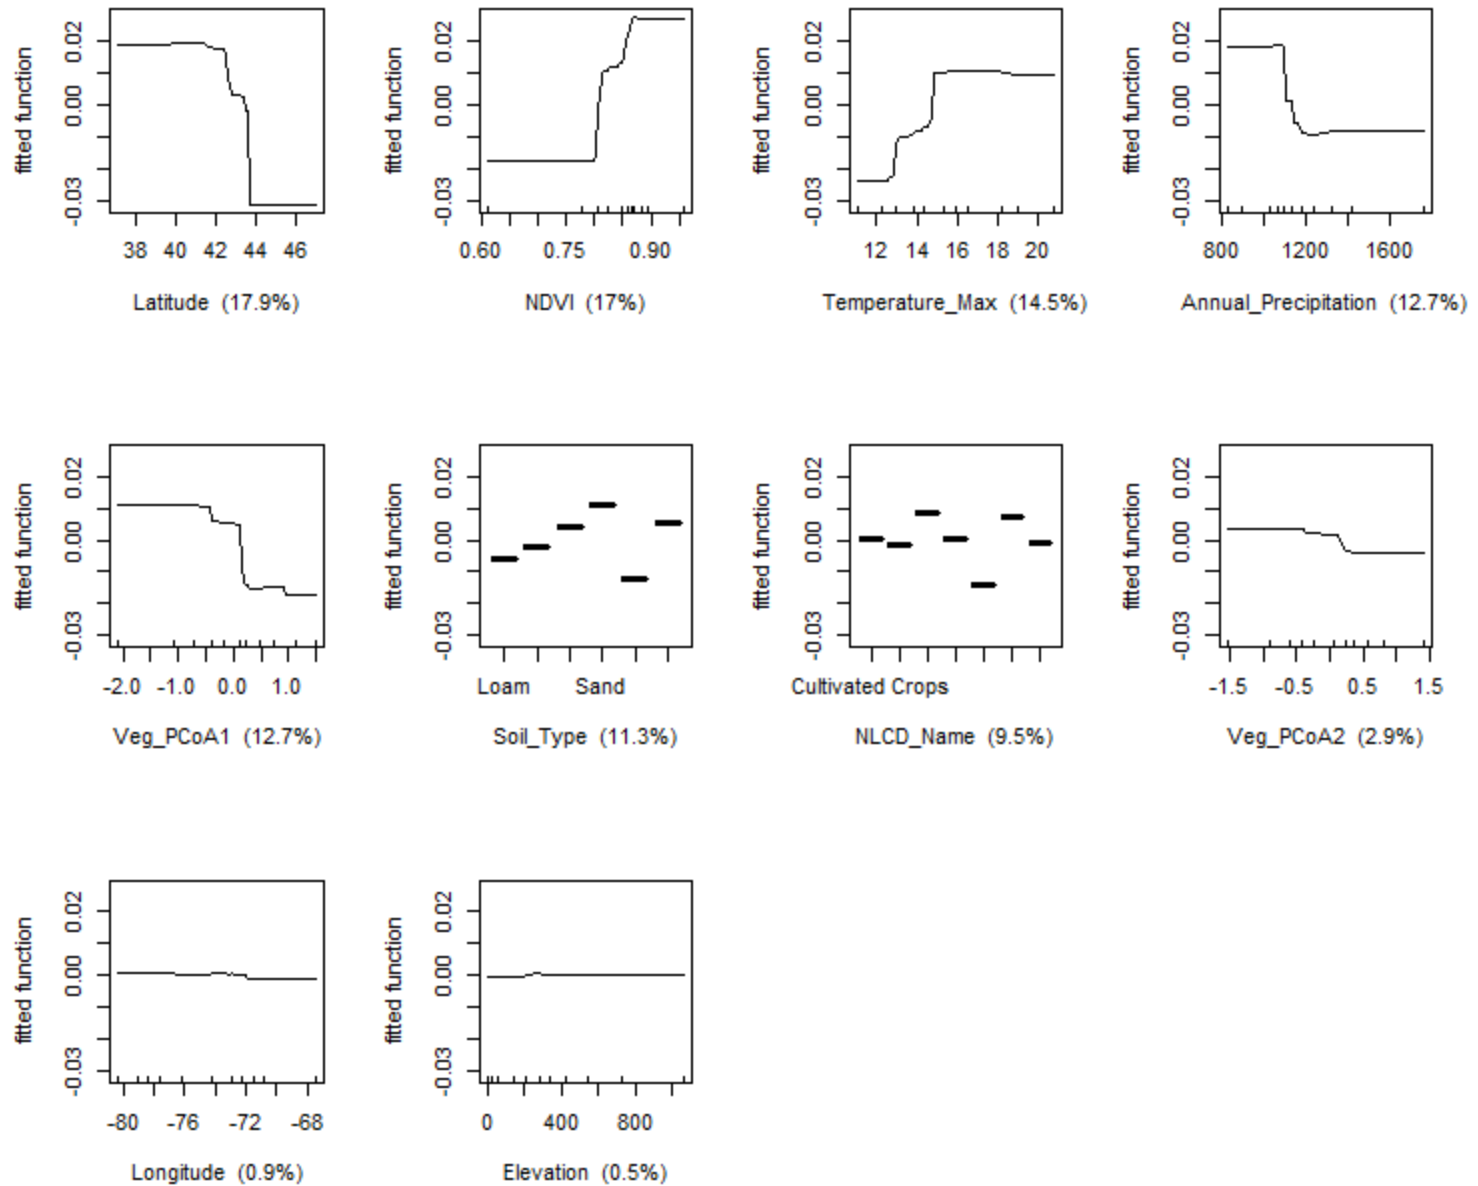

File S5 Figure S5: Open dataset BRT Fitted Functions for each environmental variable

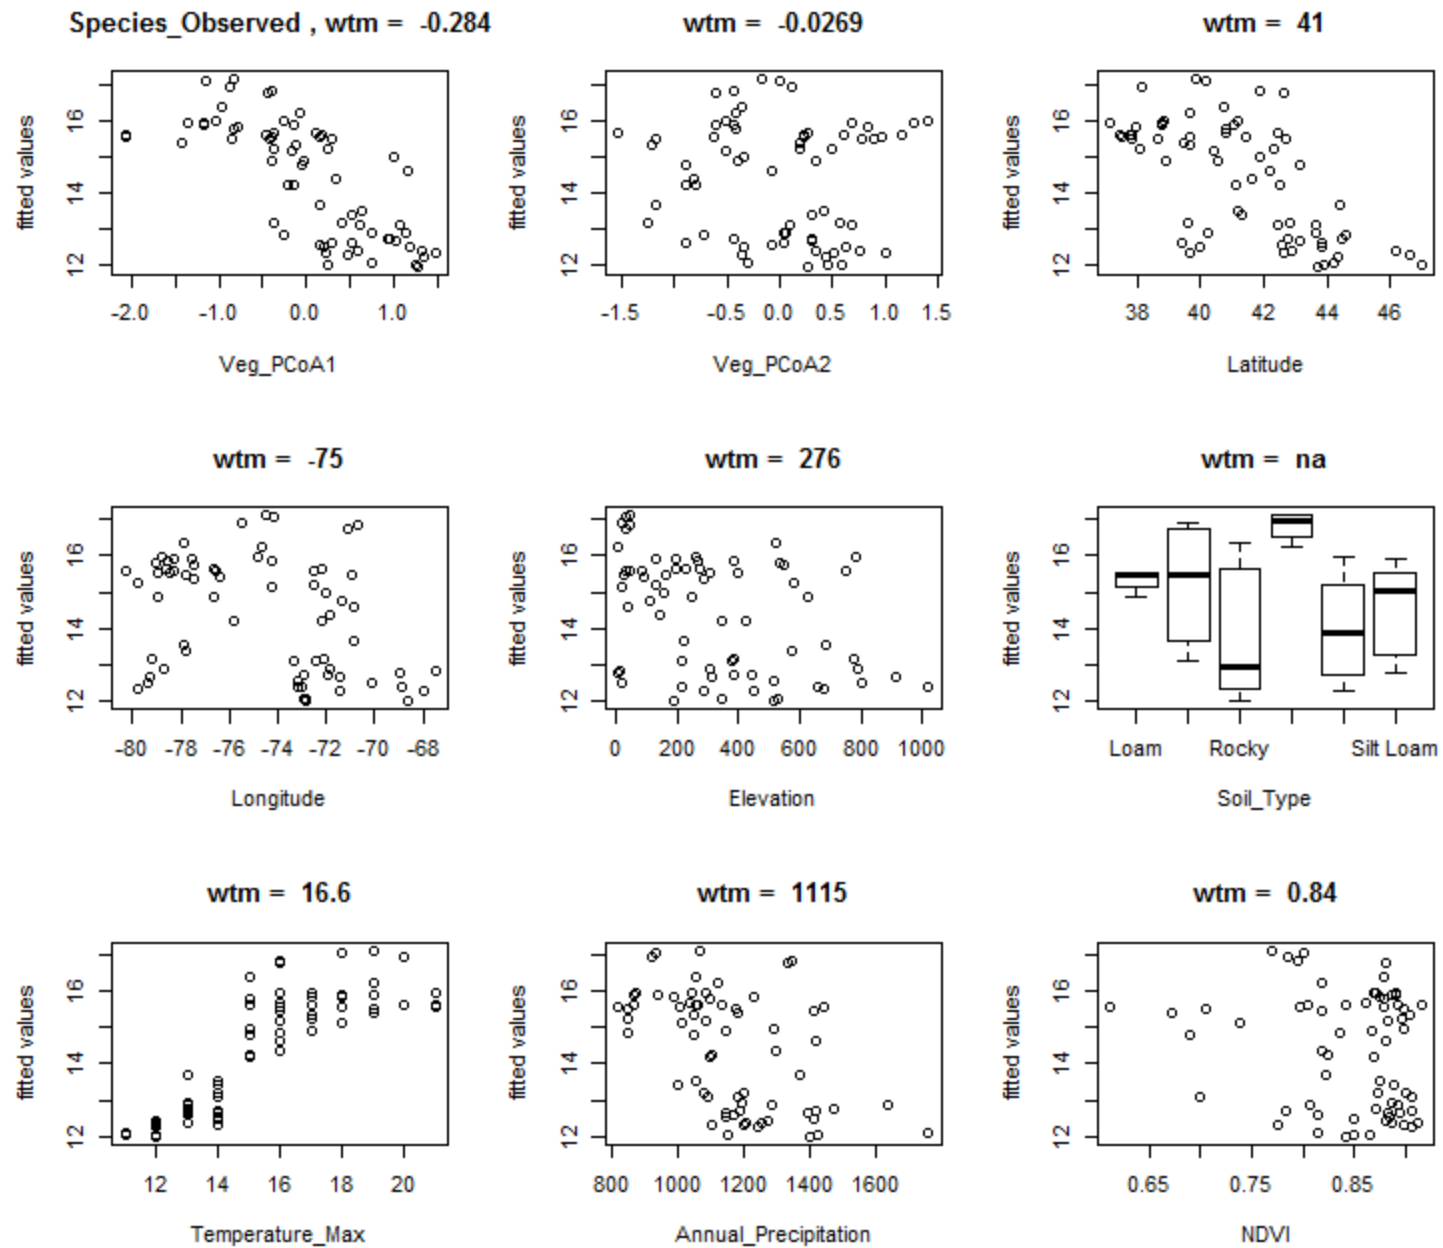

File S5 Figure S6: Combined datasets BRT Fitted Values for each environmental variable

Species\_Observed , wtm = -.4

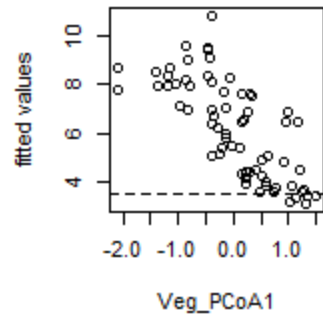

wtm = -0.00171

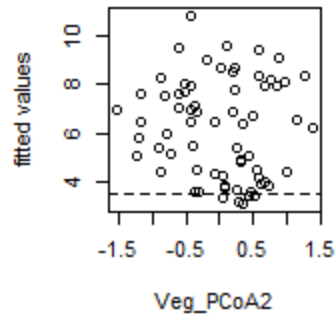

wtm = 40

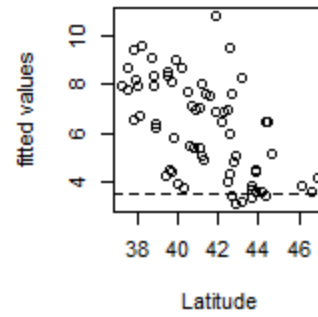

wtm = -.75

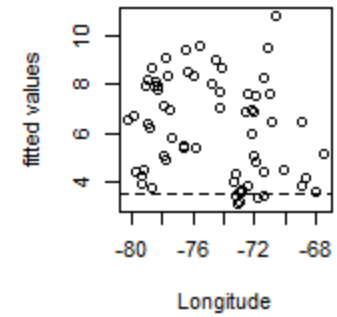

wtm = 170

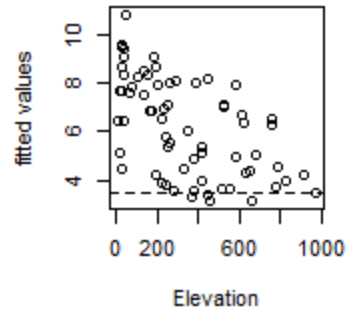

wtm = na

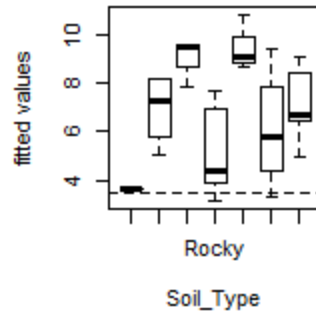

wtm = 17.7

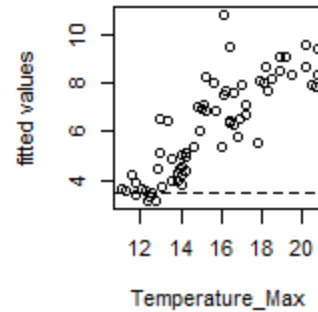

wtm = 1109

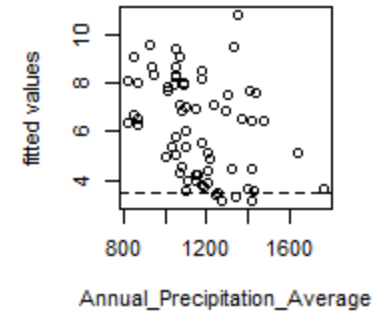

wtm = 0.84

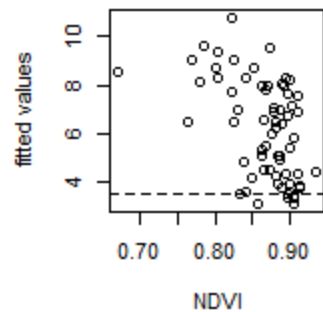

wtm = na

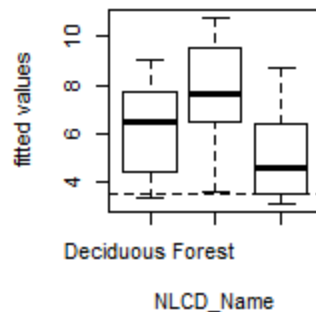

File S5 Figure S7: Forest dataset BRT Fitted values for each environmental variable

Species\_Observed , wtm = -.4

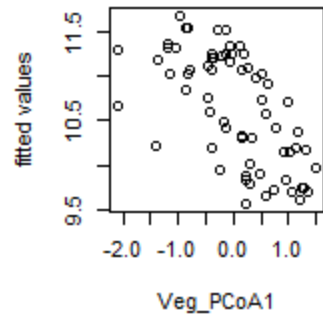

wtm = -0.0086

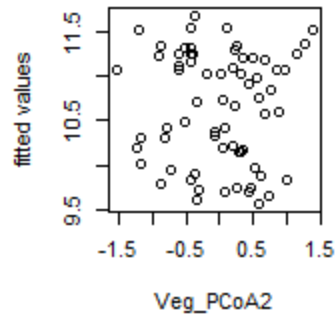

wtm = 41

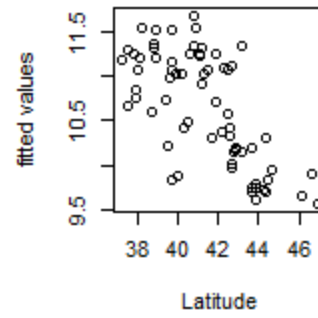

wtm = -.75

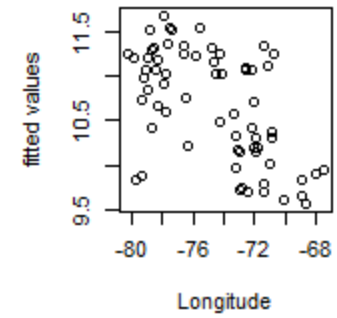

wtm = 322

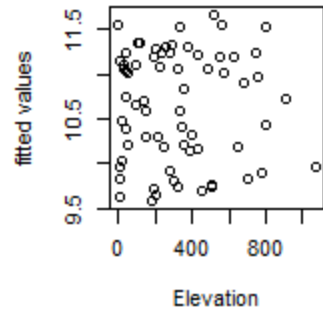

wtm = na

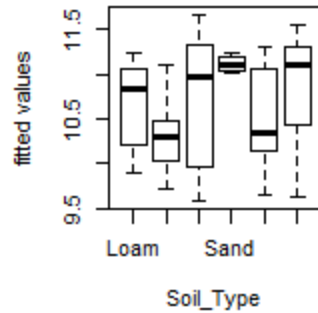

wtm = 15.9

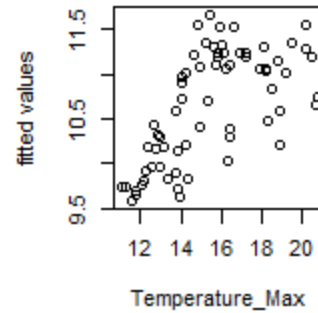

wtm = 1127

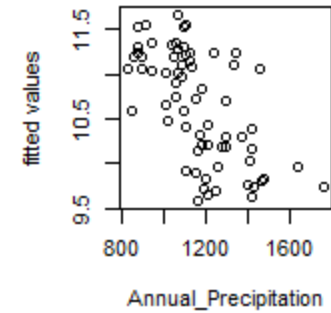

wtm = 0.84

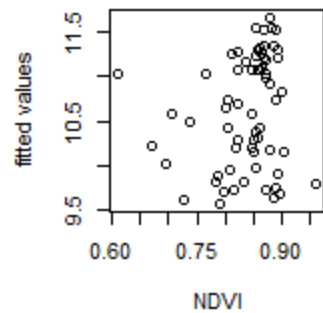

wtm = na

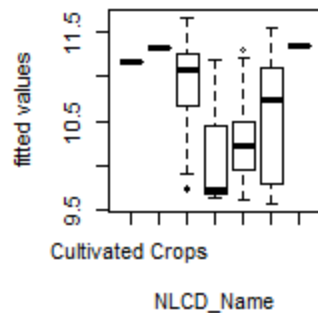

File S5 Figure S8: Open dataset BRT Fitted values for each environmental variable
