# Supplementary material for: Diversity of Eastern North American Ant Communities along Environmental Gradients
Source: PubMed Central journal article supplement (PMC3709931; doi:10.1371/journal.pone.0067973), 2013-07-12
Supplement: pone.0067973.s006.pdf [file pone.0067973.s006.pdf]

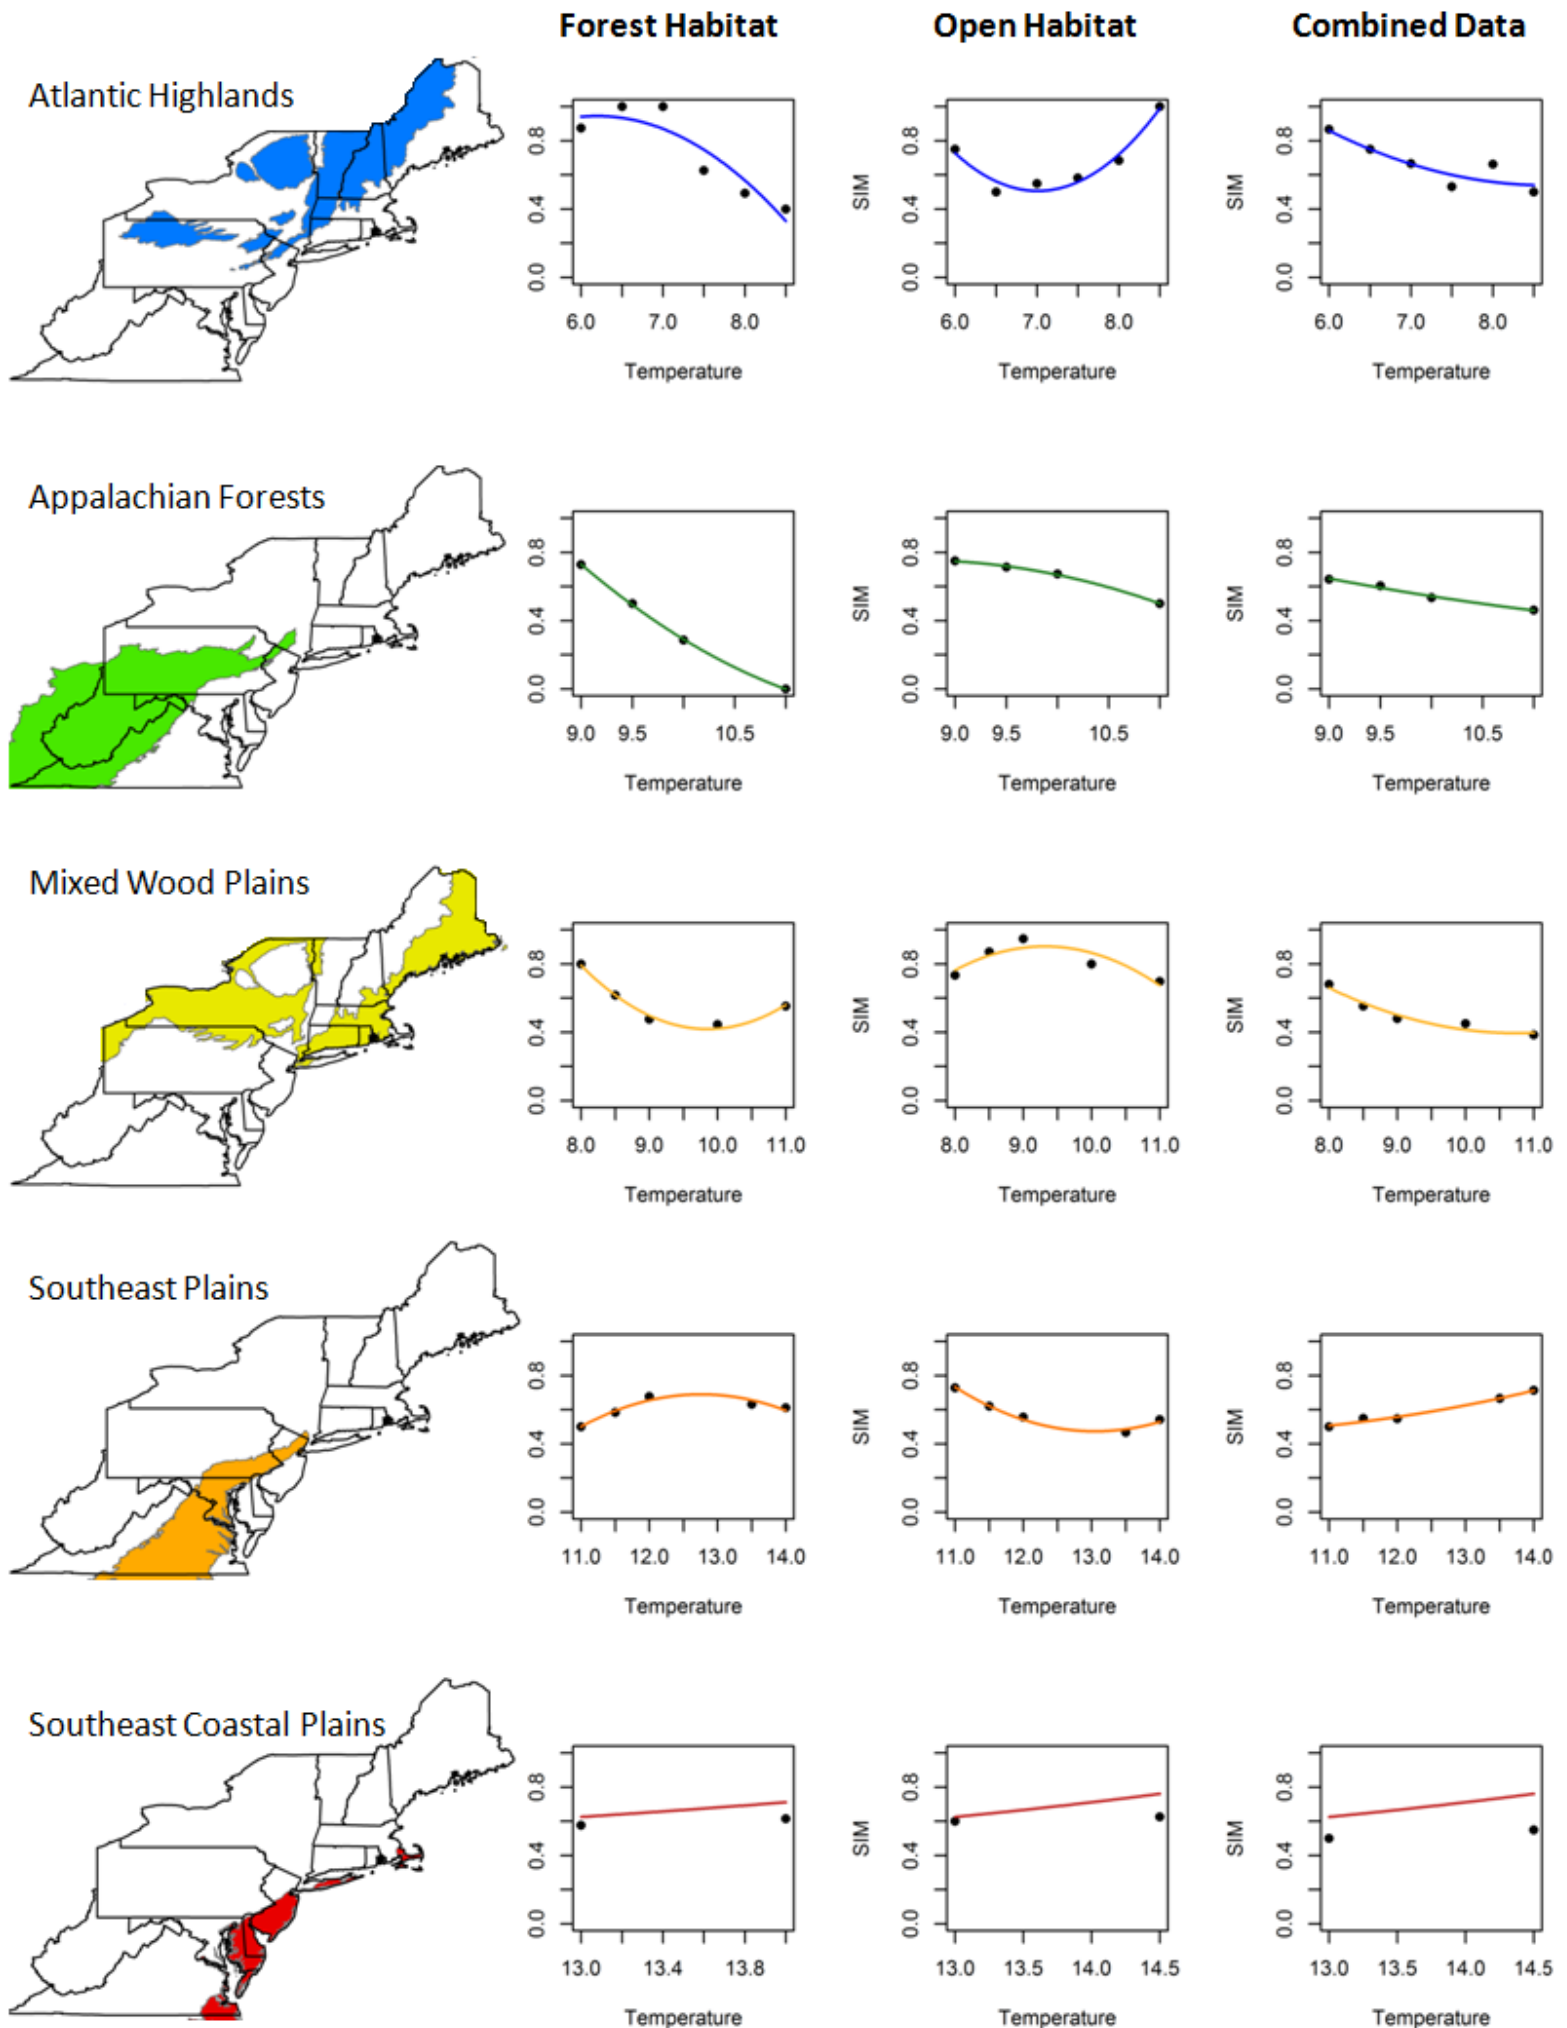

File S6 Figure S9: Beta SIM vs. Temperature regressions subdivided by ecoregion and habitat type
